# Supplementary material for: Design of a nanocomposite with gold nanoparticles as the core and casein-templated gold nanoclusters as the shell with ultra-low protein corona for enhanced photodynamic therapy
Source: Royal Society of Chemistry journal article supplement (doi:10.1039/d2ma00481j), 2022-01-01
Supplement: d2ma00481j1.pdf [file d2ma00481j1.pdf]

## Supporting Information

# Design of Nanocomposite with Gold Nanoparticle as Core and Casein Templated Gold Nanocluster as Shell with Ultra-low Protein Corona for Enhanced Photodynamic Therapy

Yue Zhang, <sup>a§</sup> Yuan Huang, <sup>a§</sup> Hao Chen, <sup>a</sup> Xinxin Luo, <sup>a</sup> Jinzhi Zhang, <sup>a</sup> Hangxing Wang, <sup>a</sup> Qichao Zou\*<sup>a</sup> and Suxiao Wang\*<sup>a</sup>

<sup>a</sup>Ministry of Education Key Laboratory for the Synthesis and Application of Organic Functional Molecules, Hubei Collaborative Innovation Centre for Advanced Organic Chemical Materials, College of Chemistry and Chemical Engineering, Hubei University, Wuhan, 430062, China.

<sup>§</sup>These two authors contribute equally.

\*Corresponding author: [wsx@hubu.edu.cn](mailto:wsx@hubu.edu.cn); [zouqichao85@sina.com](mailto:zouqichao85@sina.com);

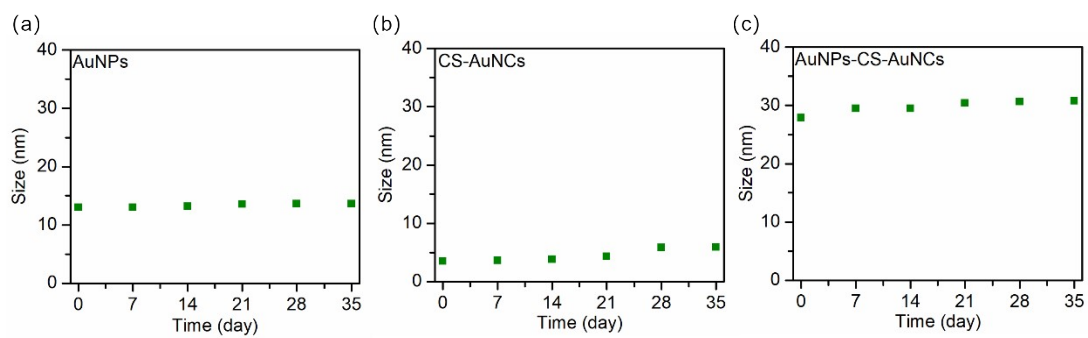

**Fig. S1** Colloidal stability of three types of gold nanocomposite in DI water.

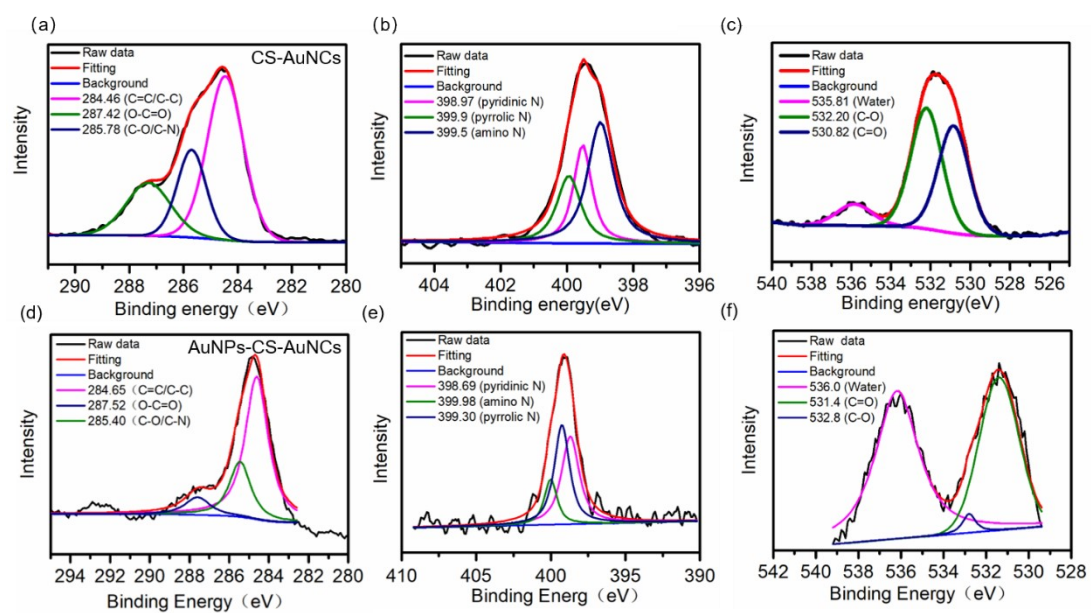

**Fig. S2** (a) C 1s XPS spectrum, (b) N 1s XPS spectrum and (c) O 1s XPS spectrum of CS-AuNCs. (d) C 1s XPS spectrum, (e) N 1s XPS spectrum and (f) O 1s XPS spectrum of AuNPs-CS-AuNCs.

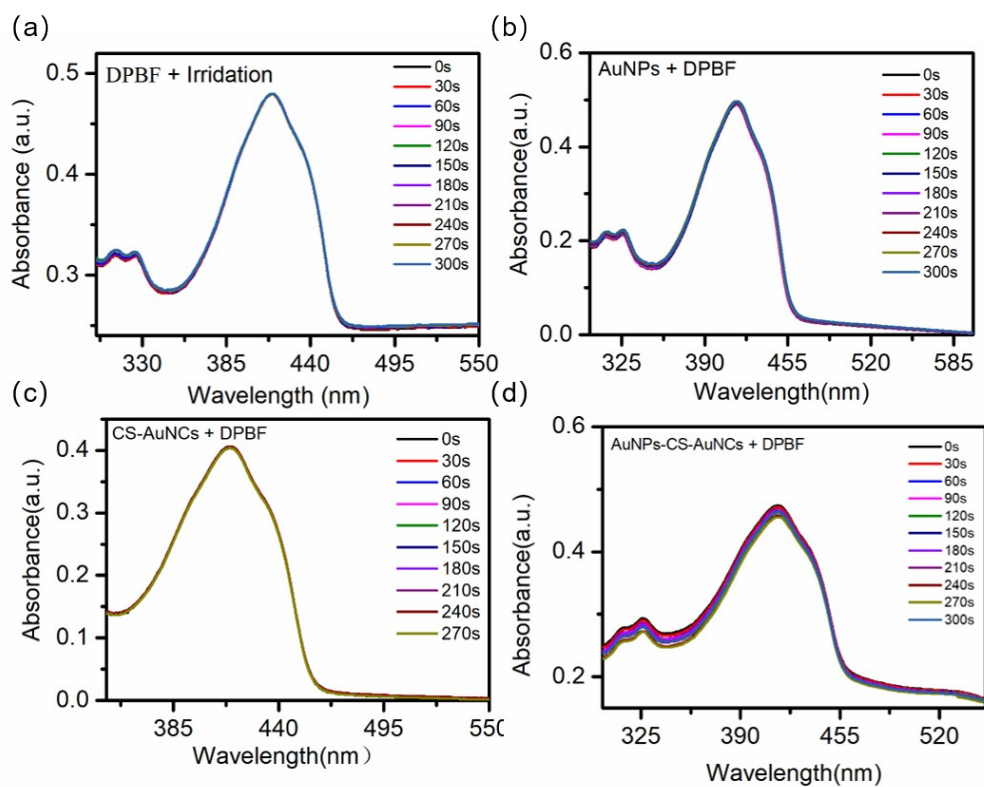

**Fig. S3** (a) Absorption spectra of DPBF under 390 nm irradiation at different times. Absorption spectra of (b) AuNPs / DPBF mixture, (c) CS-AuNCs / DPBF mixture and (d) AuNPs-CS-AuNCs / DPBF mixture without irradiation.
